# Supplementary material
Source: PubMed Central journal article supplement (PMC7049170)
Supplement: pnas.1909814117.sapp.pdf [file pnas.1909814117.sapp.pdf]

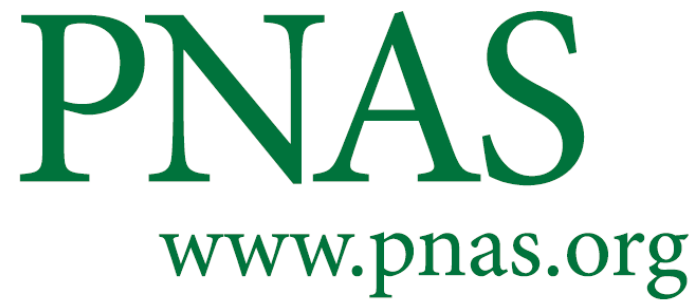

## Supplementary Information for

Decision between mitophagy and apoptosis by Parkin via VDAC1 ubiquitination

Su Jin Ham, Daewon Lee, Heesuk Yoo, Kyoungho Jun, Heejin Shin, and Jongkyeong Chung

Corresponding author: Jongkyeong Chung  
Email: [jkc@snu.ac.kr](mailto:jkc@snu.ac.kr)

### **This PDF file includes:**

Supplementary text  
Fig. S1 to S6  
References

## Supplementary Materials

### Constructs

Wild-type (WT) VDAC1 plasmid was constructed into pcDNA3.1 zeo (+) N-terminal HA-tagged vector. VDAC1 mutants (K12R, K20R, K53R, K109R, K110R and K274R) and 63 PD missense mutants of Parkin (Fig. S8A-E) were generated using a site-directed point mutagenesis method. N-terminal flag-tagged human ubiquitin was cloned into pcDNA3.1 vector. N-terminal GST-tagged pEBG vector and N-terminal Myc-tagged pcDNA3.1 zeo (+) vector were used to express Parkin constructs. The E3 ligase activity-dead mutant of Parkin, Parkin C431S, and other Parkin PD patient mutants were constructed by site-directed mutagenesis in either pEBG vector or Myc-tagged pcDNA3.1 zeo (+) vector. In addition, human PINK1 WT 3×Myc and human PINK1 kinase-dead (K219A, D362A, and D384A) 3×Myc were cloned into pcDNA3.1 zeo (+) vector. Porin cDNA was cloned into pCDNA3 N-terminal HA-tagged vector. *Drosophila* Parkin WT and C431S were cloned into pAC5.1 vector. Cells were treated with carbonyl cyanide m-chlorophenyl hydrazone (CCCP, Sigma).

### Antibodies

For immunoblot analyses the following antibodies were used: rabbit anti-HA (1:1,000; Cell Signaling), mouse anti-Flag (1:1,000; MBL), rabbit anti-ubiquitin (1:1,000, Cell Signaling), mouse anti-GST (1:1,000, Upstate), mouse anti-Myc (1:1,000, MBL), rabbit anti-cleaved caspase3 (1:1,000, Cell Signaling), mouse anti-VDAC1/Porin (1:1,000, Abcam), and mouse anti-tubulin antibody (1:1,000, E7 clone, DSHB). Peroxidase-conjugated secondary antibodies were purchased from Jackson Laboratory.

### Immunoblotting for *Drosophila*

Adult flies (n=10) were homogenized with RIPA buffer (50 mM Tris pH 8.0, 150 mM NaCl, 0.5% sodium deoxycholate, 1% NP-40, 0.1% SDS, 2 mM DTT, 1 mM PMSF, 10 g/ml leupeptin, and 1 g/ml pepstatin A) at 4°C for 30 minutes. Total proteins were quantified using the BCA protein assay kit (Pierce). Lysates were subjected to SDS-PAGE analysis followed by immunoblotting according to standard procedures. The blots were developed and viewed under LAS4000 (Fujifilm).

### Transmission electron microscopy

HeLa cells stably expressing GFP-Parkin were fixed with 3% glutaraldehyde in 0.1 M cacodylate buffer (pH 7.2)-containing 0.1% CaCl<sub>2</sub> for 3 hours at RT. They were washed five times with 0.1 M cacodylate buffer at 4°C. Then, they were post-fixed with 1% OsO<sub>4</sub> in 0.1 M cacodylate buffer-containing 0.1% CaCl<sub>2</sub> for 2 hours at 4°C. After rinsing with cold distilled water, the cells were dehydrated slowly with an ethanol series and propylene oxide at 4°C. The samples were embedded in Embed-812 (EMS). After polymerization of the resin at 60°C for 36 hours, serial sections were cut with a diamond knife on an ULTRACUT UC7 ultramicrotome (Leica) and mounted on formvar-coated slot grids. Sections were stained with 4% uranyl acetate for 10 minutes and lead citrate for 7 minutes. They were observed using a Tecnai G2 Spirit Twin transmission electron microscope (FEI).

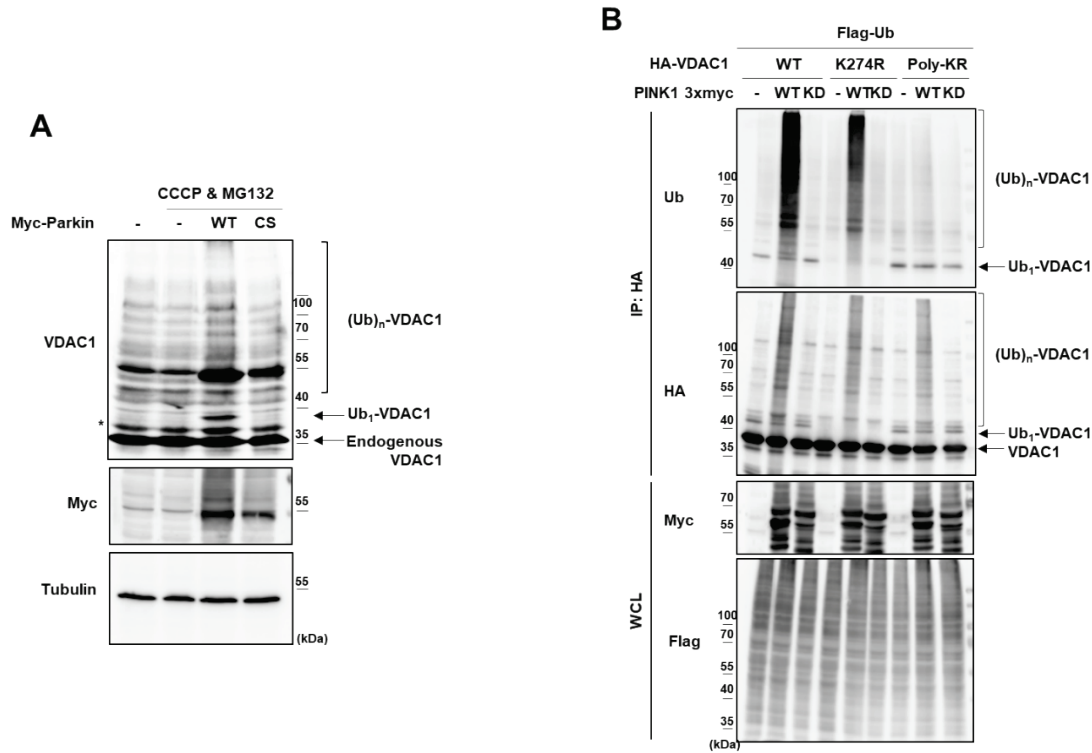

**Fig. S1. VDAC1 mono- and poly-ubiquitination are dependent on PINK1 and Parkin activity.**

(A) Ubiquitination assays for endogenous VDAC1. Myc-tagged Parkin wild type (WT) or CS (C431S; an E3 ligase-dead Parkin mutant) was expressed in HEK293T cells and treated with 20  $\mu$ M CCCP and 20  $\mu$ M MG132 for 4 hours. Whole cell lysates were analyzed for immunoblot analysis with indicated antibodies. The mono-ubiquitination band was marked on the right side ( $Ub_1$ -VDAC1) and the poly-ubiquitination bands were marked by a bracket. Star was marked for a non-specific protein band. (B) HEK293T cells expressing Flag-tagged ubiquitin and HA-tagged VDAC1 wild type (WT), K274R, or Poly-KR were co-expressed with Myc-tagged PINK1 WT or a kinase-dead mutant (KD; K219A, D362A, and D384A). Whole cell lysates (WCL) or anti-HA immunoprecipitated (IP) samples were analyzed for immunoblotting to detect indicated proteins. The mono- and poly-ubiquitinated VDAC1 were marked by arrows and square brackets, respectively.

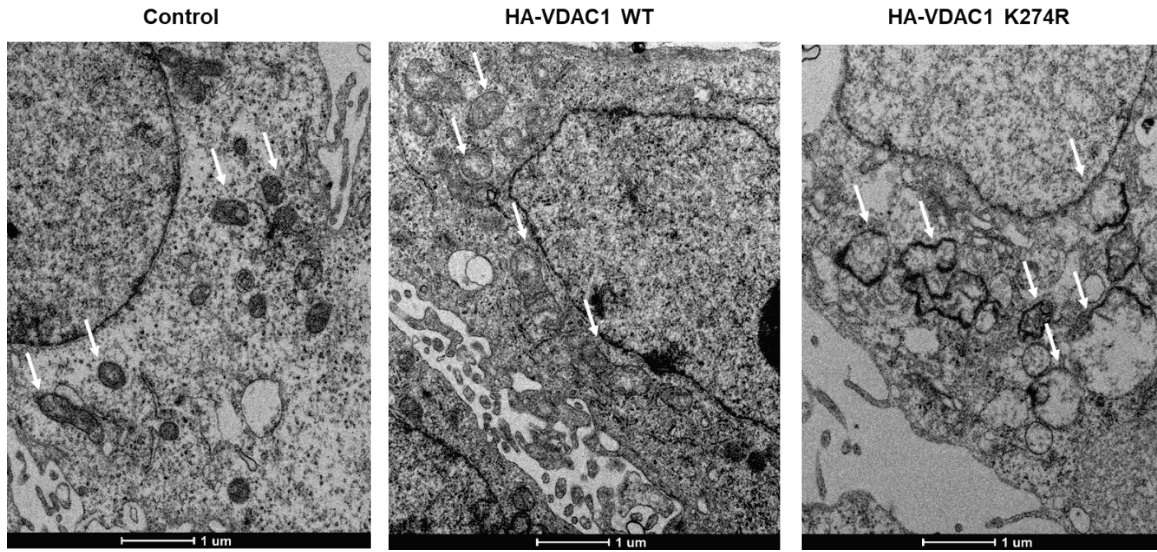

**Fig. S2. Abnormal mitochondrial morphology displayed by VDAC1 K274R expression.** HeLa cells stably expressing GFP-Parkin were expressed with an empty vector (left), HA-tagged VDAC1 WT (middle), or HA-tagged VDAC1 K274R mutant (right). We observed mitochondrial morphology under an electron microscopy. Scale bars indicate 1  $\mu\text{m}$ . White arrows indicate mitochondria.

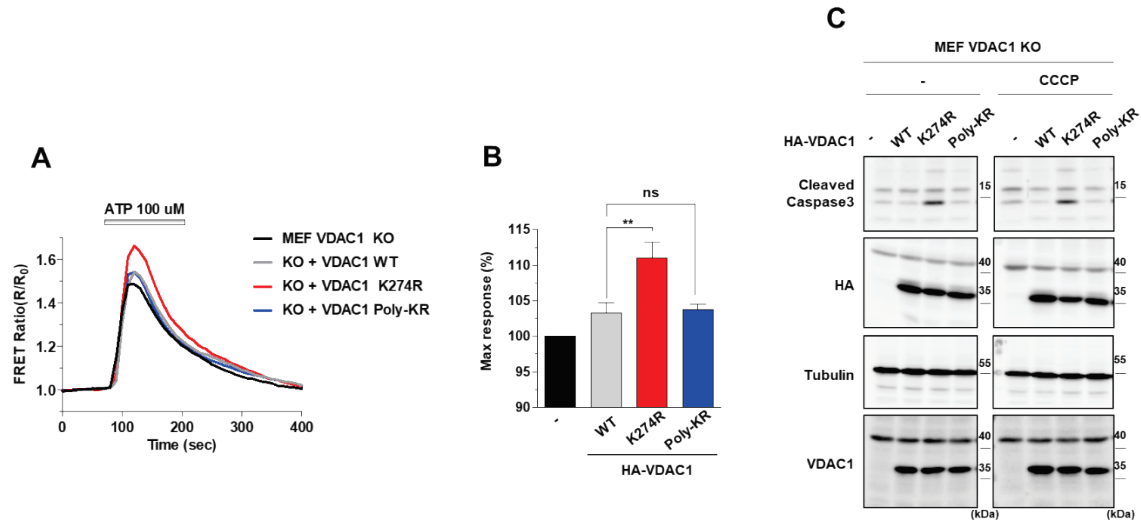

**Fig. S3. VDAC1 K274R induces mitochondrial calcium uptake and apoptosis.**

(A-B) VDAC1 KO mouse embryonic fibroblast (MEF) cells were transfected with HA-tagged VDAC1 WT, K274R, or Poly-KR and co-transfected with 4mitD3, a mitochondrial calcium indicator. Cells were then treated with 100  $\mu$ M of ATP for 3 minutes and were monitored for the changes in 4mitD3 fluorescence. (B) Maximum mitochondrial calcium uptake for VDAC1 KO MEF cells expressing VDAC1 WT, K274R, or Poly-KR in (A).  $n=50\sim70$  cells. Analyzed by ANOVA tukey's test,  $**p<0.05$ . (C) VDAC1 KO MEF cells expressing HA-tagged VDAC1 WT, K274R, or Poly-KR were compared with VDAC1 KO MEF cells (left panels). Those cells were treated with 30  $\mu$ M CCCP for 6 hours (right panels). Whole cell lysates were analyzed for immunoblotting to detect indicated proteins.

**A**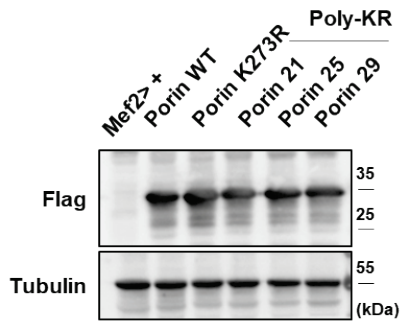**B**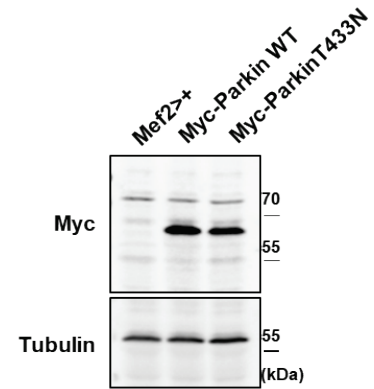

**Fig. S4. Characterization of Porin or Parkin transgenic flies.**

(A) Transgenic flies expressing Flag-tagged Porin were analyzed by immunoblotting to determine Porin protein levels. We used Porin WT, K273R, and #21 Poly-KR lines for further studies. (B) Transgenic flies expressing Myc-tagged Parkin WT or T433N using *Mef2-gal4* driver were analyzed for Parkin protein levels.

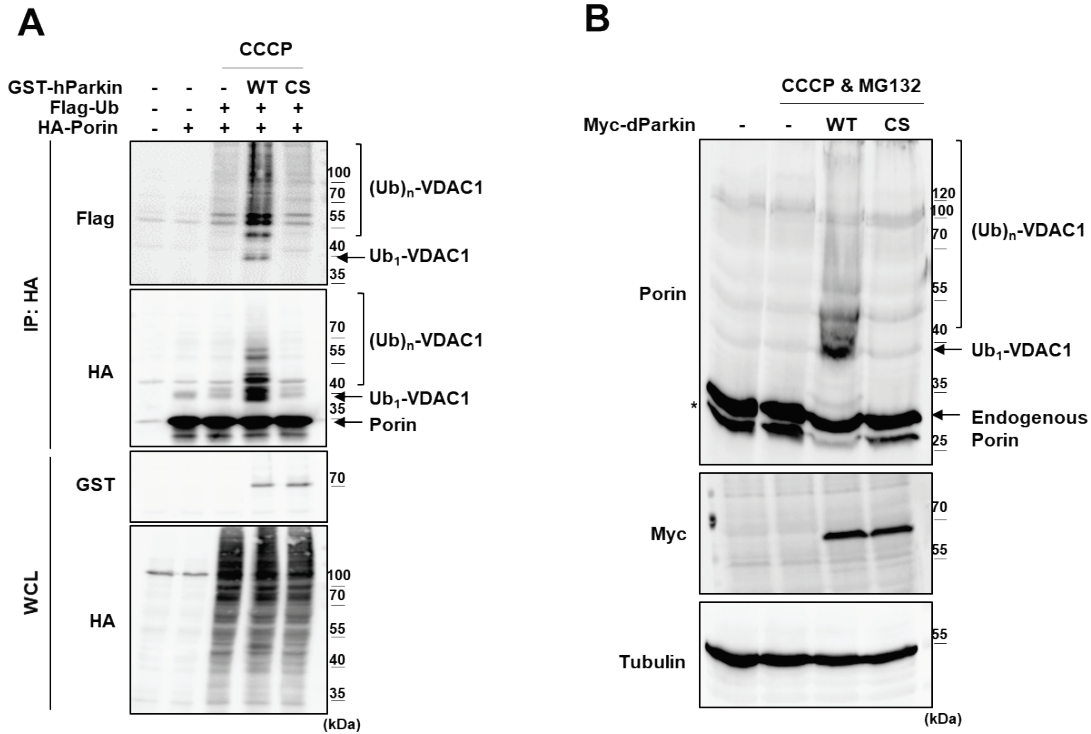

**Fig. S5. Parkin-dependent ubiquitination of Porin in HEK293T cells and S2 cells.**

(A) Ubiquitination assays for Porin (the *Drosophila* orthologue of human VDAC1) by Parkin. HEK293T cells were transfected with indicated constructs and treated with or without 20  $\mu$ M CCCP for 4 hours. Whole cell lysates (WCL) were immunoprecipitated (IP) and analyzed for immunoblot (IB) analyses with indicated antibodies. Human Parkin wild type (WT) and CS (C431S) mutants were expressed as indicated. (B) Ubiquitination assays for Porin in Schneider 2 (S2) cells. S2 cells were transfected with Myc-tagged *Drosophila* Parkin (dParkin) WT or CS (C431S) and were analyzed for ubiquitination of endogenous Porin protein after treatment of 40  $\mu$ M MG132 and 40  $\mu$ M CCCP for 6 hours. Whole cell lysates were analyzed for immunoblot analyses with indicated antibodies.

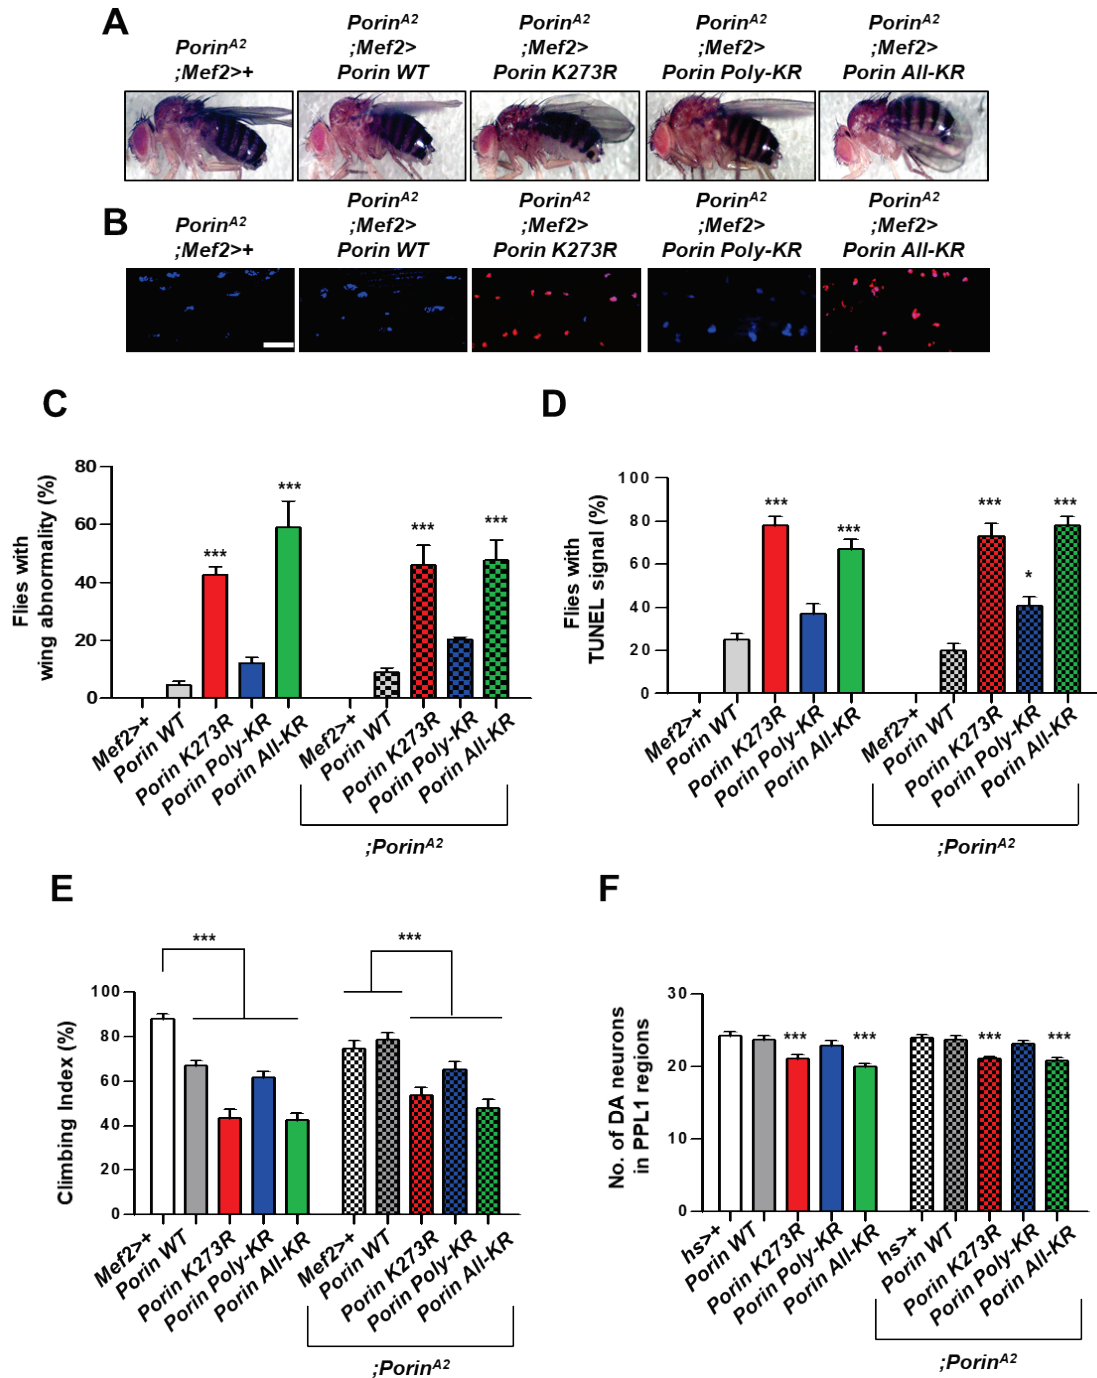

**Fig. S6. Porin K273R and All-KR flies display phenotypes related to PD.**

(A, C) Defects in the wing postures of Porin flies. Transgenic flies expressing Porin WT, K273R, Poly-KR, or All KR using *Mef2-gal4* driver in Proin (*Porin<sup>A2</sup>*) null background. (C) Percentage of the flies with defective wing postures in (A). n=300 from three independent experiments. (B, D) TUNEL signals for apoptosis (red) and DAPI staining for the nucleus (blue) in the thoraces of transgenic flies. White bar indicates 5  $\mu$ m. (D) Percentage of the flies with TUNEL signals in (B). n=100 from ten independent experiments. (E) Percentage of the transgenic flies with defective climbing ability. n=100 from ten independent experiments. (F) Numbers of DA neurons in the brain protocerebral posterior lateral 1 (PPL1) region. n=10. All quantifications were analyzed by



One-way ANOVA with tukey's multiple comparison test and are presented as mean  $\pm$  SD, \*\*\* $p < 0.001$ , \* $p < 0.05$ .

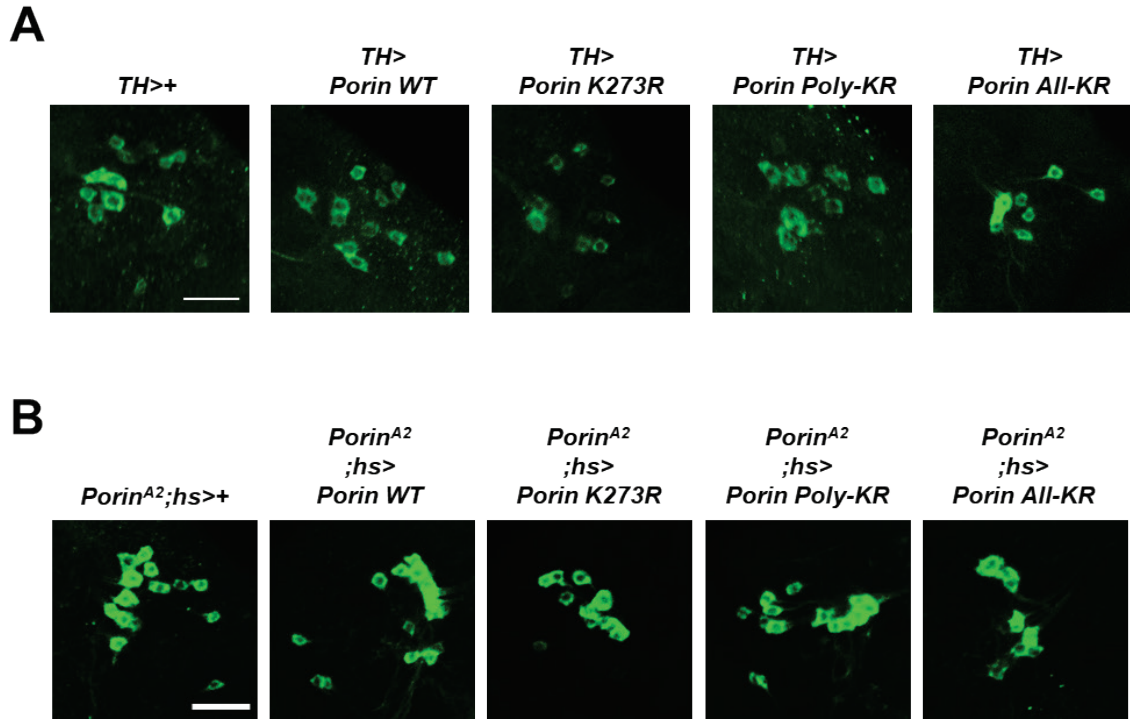

**Fig. S7. DA neurons in the PPL1 region of Porin transgenic flies.**

(A) Confocal images of DA neurons from the transgenic flies expressing Porin WT, K273R or Poly-KR by *TH-gal4* driver. The DA cells were stained by anti-TH antibody as described in the Materials and Methods section. The scale bar indicates 20  $\mu$ m. (B) Confocal images of DA neurons from the transgenic flies expressing Porin WT, K273R, Poly-KR, or All KR in Porin null background (*Porin<sup>A2</sup>*) by *hs-gal4* driver. The DA cells were stained by anti-TH antibody. The scale bar indicates 20  $\mu$ m.

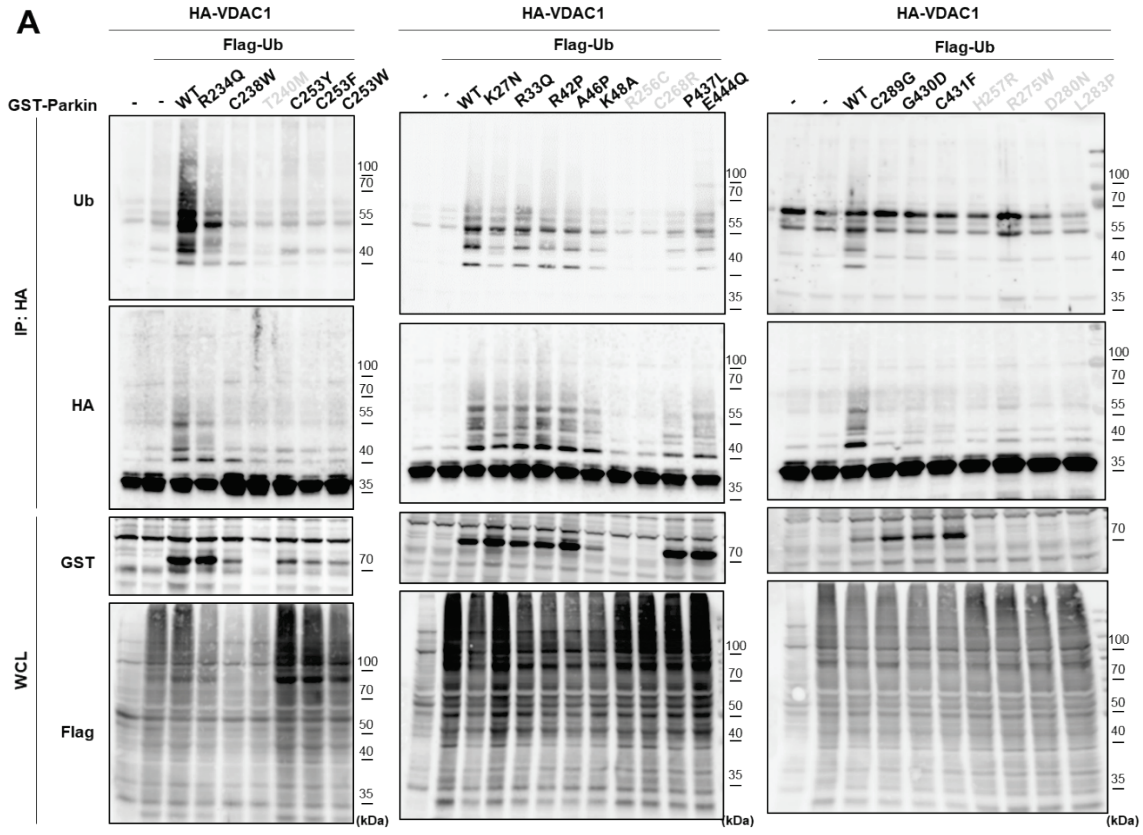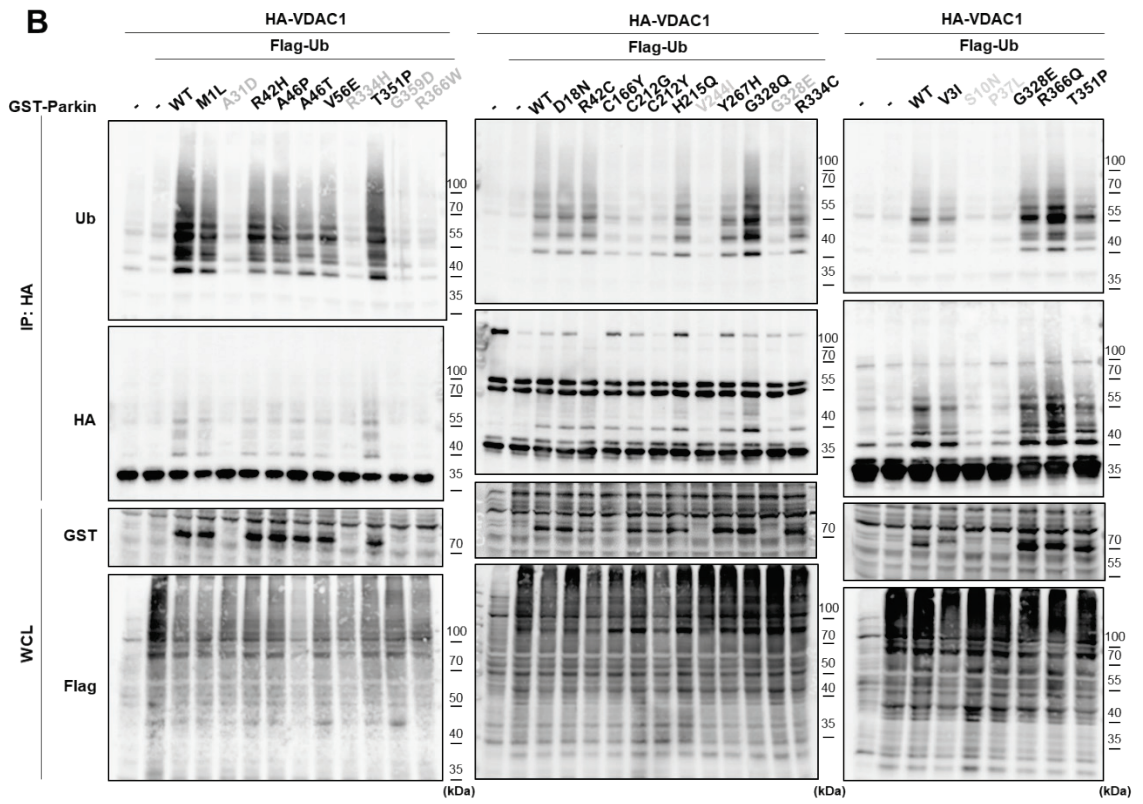

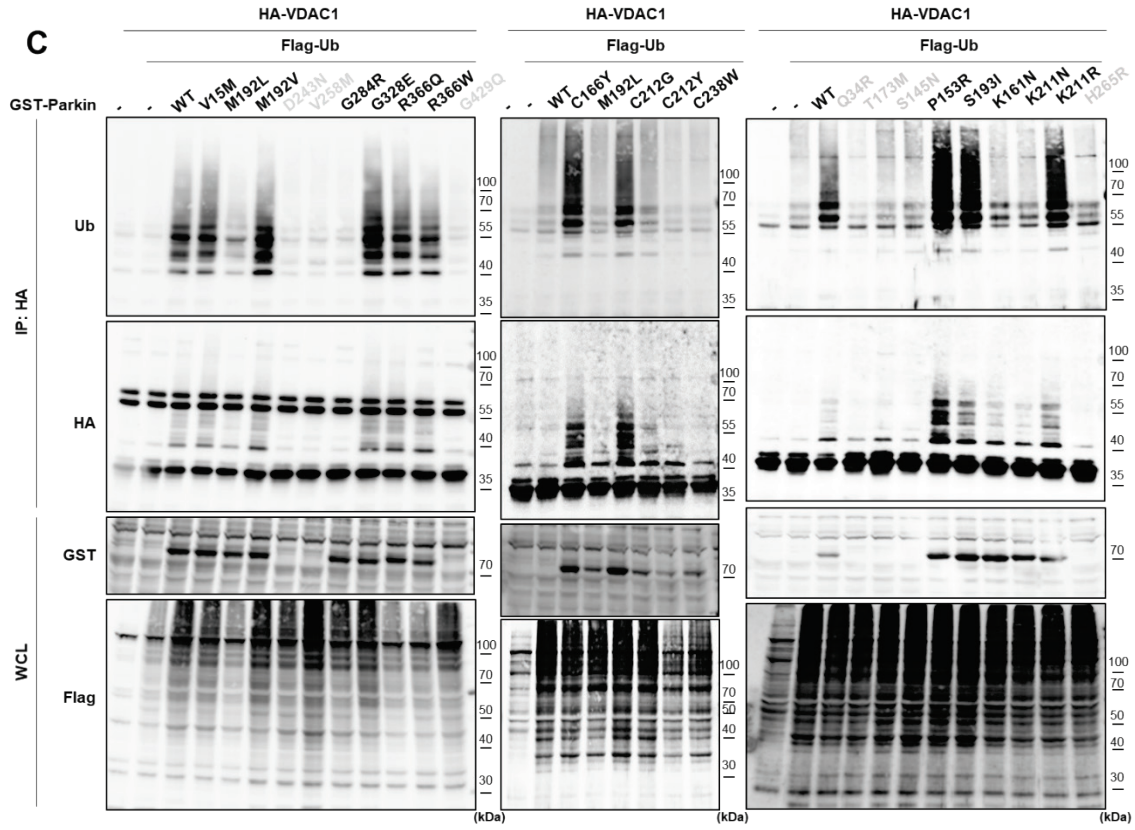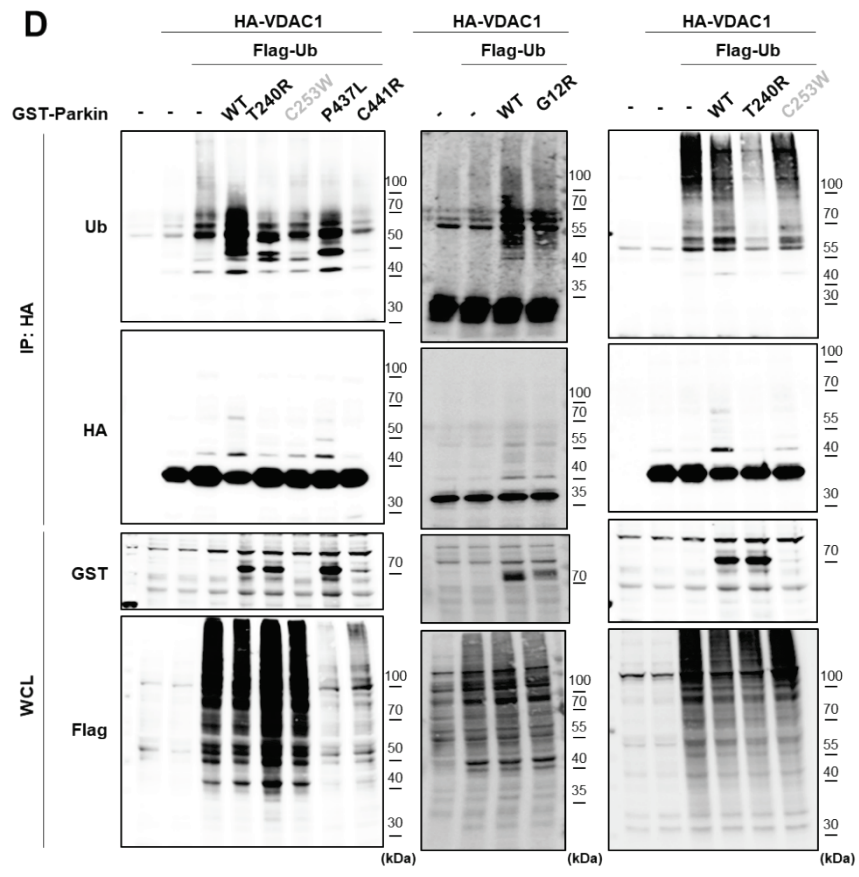

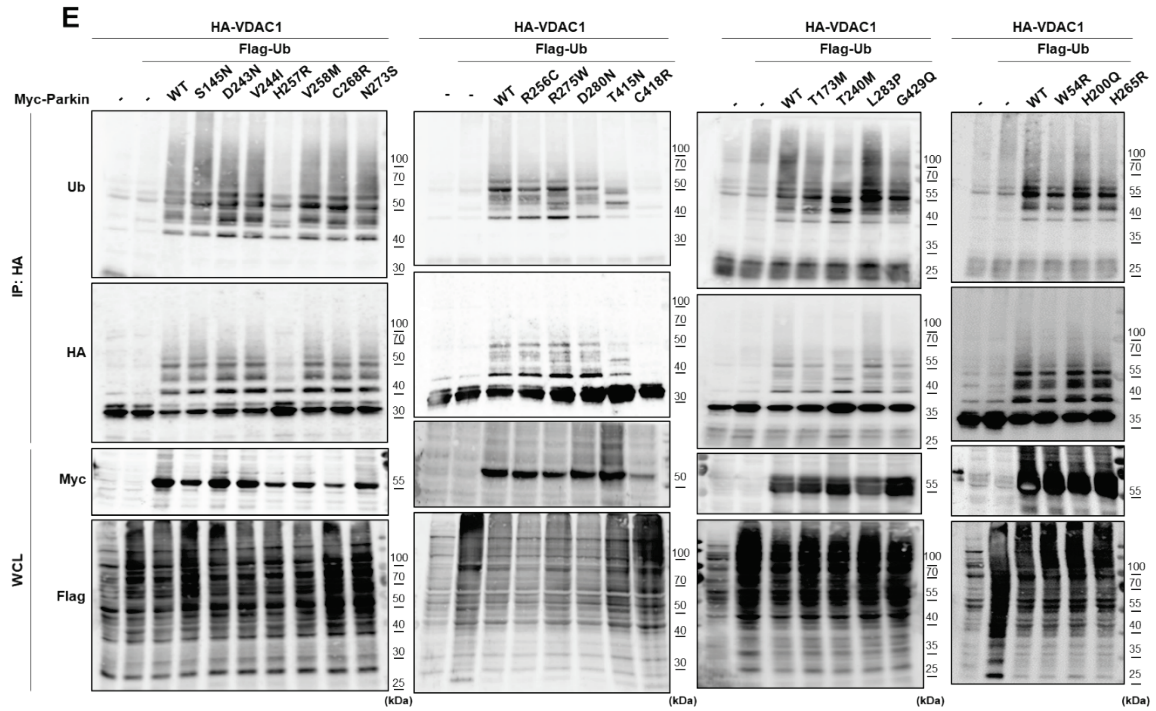

**Fig. S8. Assays for VDAC1 ubiquitination by Parkin with 63 different PD patient mutations.** (A-E) Parkin WT or each of 63 Parkin mutants was expressed in HEK293T cells expressing Flag-tagged ubiquitin and HA-tagged VDAC1. Whole cell lysates (WCL) or anti-HA immunoprecipitated (IP) samples were analyzed for immunoblotting to detect indicated proteins. Parkin mutants in grey color were not expressed. Each gel shows Parkin WT as a control and for comparison.

## References

1. Park, J., Kim, Y., Choi, S., Koh, H., Lee, S. H., Kim, J. M., & Chung, J. (2010). *Drosophila* Porin/VDAC affects mitochondrial morphology. *PLoS One*, 5(10), e13151. doi:10.1371/journal.pone.0013151
2. Park, J., Lee, S. B., Lee, S., Kim, Y., Song, S., Kim, S., Bae, E., Kim, J., Shong, M., Kim, J. M., Chung, J. (2006). Mitochondrial dysfunction in *Drosophila* PINK1 mutants is complemented by parkin. *Nature*, 441(7097), 1157-1161. doi:10.1038/nature04788
